# Supplementary material for: PI3K/AKT/β-Catenin Signaling Regulates Vestigial-Like 1 Which Predicts Poor Prognosis and Enhances Malignant Phenotype in Gastric Cancer
Source: MDPI journal article supplement (doi:10.3390/cancers11121923), 2019-12-03
Supplement: s1 [file s1]

Article

# PI3K/AKT/ $\beta$ -Catenin Signaling Regulates Vestigial-Like 1 Which Predicts Poor Prognosis and Enhances Malignant Phenotype in Gastric Cancer

Bo-Kyung Kim <sup>1,t,\*</sup>, Jae-Ho Cheong <sup>2,3,t</sup>, Joo-Young Im <sup>1</sup>, Hyun Seung Ban <sup>4</sup>, Seon-Kyu Kim <sup>1</sup>, Mi-Jung Kang <sup>1</sup>, Jungwoon Lee <sup>5</sup>, Seon-Young Kim <sup>1,6</sup>, Kyung-Chan Park <sup>1,6</sup>, Soonmyung Paik <sup>3</sup>, and Misun Won <sup>1,6,\*</sup>

**Table S1.** Expression of VGLL1 and clinicopathologic characteristics of 556 patients with gastric cancer.

|                    |            | VGLL1 low<br>(n = 252) | VGLL1 high<br>(n = 304) | Chi-square<br>(p-value) |
|--------------------|------------|------------------------|-------------------------|-------------------------|
| Age                | <60        | 125 (49.4%)            | 128 (50.6%)             | 0.069                   |
|                    | >60        | 127 (41.9%)            | 176 (58.1%)             |                         |
| Sex                | Male       | 173 (45.5%)            | 207 (54.5%)             | 0.887                   |
|                    | Female     | 79 (44.9%)             | 97 (55.1%)              |                         |
| Lauren             | Intestinal | 92 (38.5%)             | 147 (61.5%)             | 0.000368                |
|                    | Diffuse    | 112 (56.9%)            | 85 (43.1%)              |                         |
|                    | Mixed      | 14 (58.3%)             | 10 (41.7%)              |                         |
| Tumor size         | <100       | 224 (45.4%)            | 269 (54.6%)             | 0.881                   |
|                    | >100       | 28 (44.4%)             | 35 (55.6%)              |                         |
| pT stage           | T1         | 3 (20%)                | 12 (80%)                | 0.00001                 |
|                    | T2         | 13 (28.9%)             | 32 (71.1%)              |                         |
|                    | T3         | 50 (72.5%)             | 19 (27.5%)              |                         |
|                    | T4         | 186 (43.6%)            | 241 (56.4%)             |                         |
| pN stage           | N0         | 61 (57%)               | 46 (43%)                | 0.0418                  |
|                    | N1         | 45 (40.2%)             | 67 (59.8%)              |                         |
|                    | N2         | 61 (45.9%)             | 72 (54.1%)              |                         |
|                    | N3         | 85 (41.7%)             | 119 (58.3%)             |                         |
| TMN stage          | I          | 4 (19%)                | 17 (81%)                | 0.000017                |
|                    | II         | 88 (60.7%)             | 57 (39.3%)              |                         |
|                    | III        | 155 (41.9%)            | 215 (58.1%)             |                         |
|                    | IV         | 5 (25%)                | 15 (75%)                |                         |
| AJCC stage         | I          | 13 (32.5%)             | 27 (57.5%)              | 0.000645                |
|                    | II         | 95 (58.6%)             | 67 (41.4%)              |                         |
|                    | III        | 122 (41.6%)            | 171 (58.4%)             |                         |
|                    | IV         | 22 (36.1%)             | 39 (63.9%)              |                         |
| Lymphatic invasion | Absent     | 60 (63.2%)             | 35 (36.8%)              | 0.003371                |
|                    | Present    | 119 (45.6%)            | 142 (54.4%)             |                         |
| Vein invasion      | Absent     | 71 (55.9%)             | 56 (44.1%)              | 0.1783                  |
|                    | Present    | 106 (48.6%)            | 113 (51.4%)             |                         |
| Neural invasion    | Absent     | 51 (58%)               | 37 (42%)                | 0.1815                  |
|                    | Present    | 83 (66.9%)             | 41 (33.1%)              |                         |

pT, primary tumor; pN, regional lymph nodes.

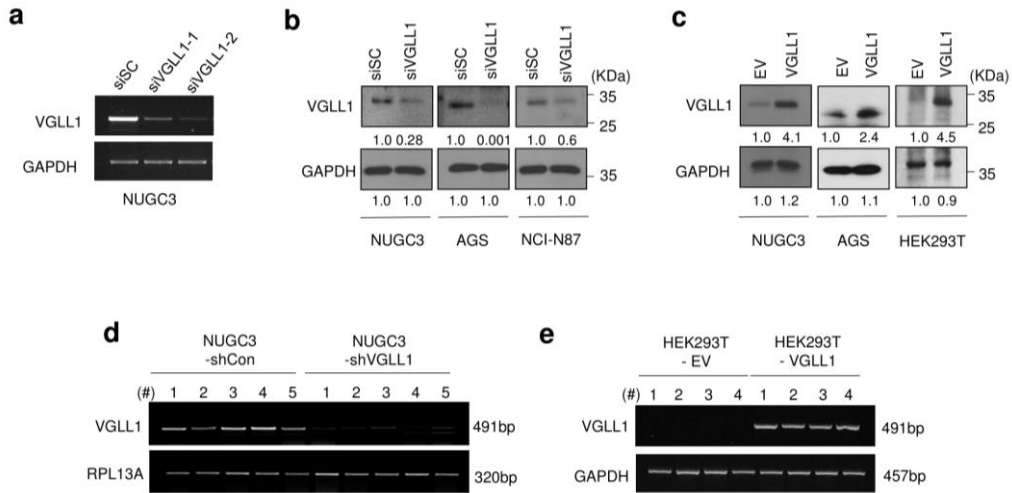

**Figure S1.** The expression of VGLL1. (a,b) The cells were transfected with siScramble or siVGLL1. (c) The cells were transfected with pcDNA3 or pcDNA3-VGLL1. The expression of VGLL1 was analyzed by western blotting. (d,e) VGLL1 expression in tumor tissues of the xenograft model as measured by RT-PCR.

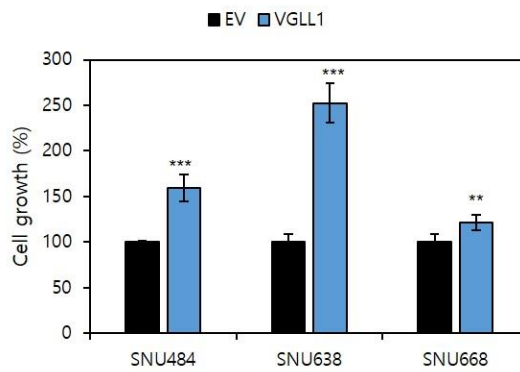

**Figure S2.** The effect of VGLL1 overexpression on the proliferation of gastric cancer cells expressing low VGLL1. SNU484, SNU638, and SNU668 cells were transfected with pcDNA3.1 or pcDNA3.1-VGLL1 and incubated for 72 h. Total cells were analyzed by Sulforhodamine B staining.

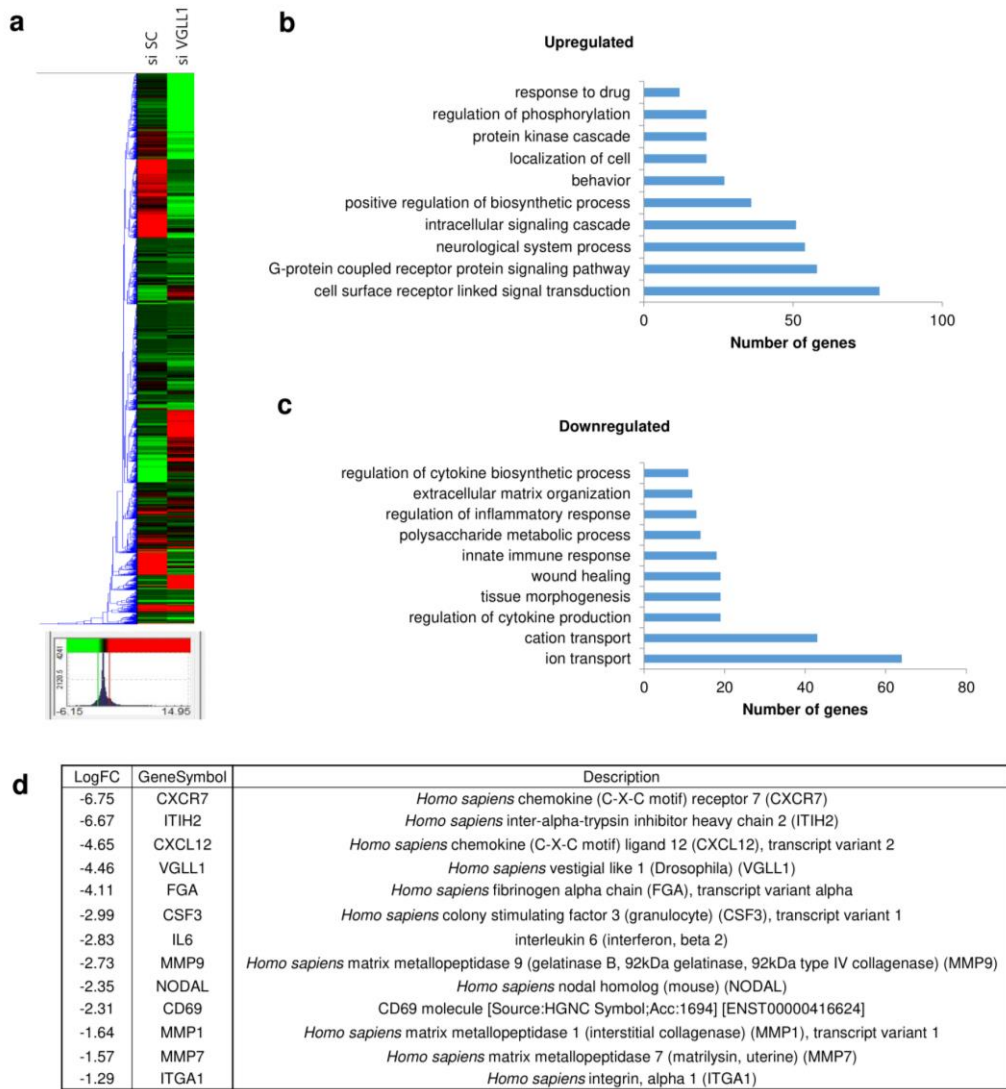

**Figure S3.** Microarray analysis of NUGC3 cells treated with siVGLL1. (a) Heatmap analysis. (b) Gene Ontology pathway analysis. Gene set enrichment analyses were performed using the DAVID bioinformatics. (d) The list of down-regulated genes after VGLL1 knockdown.

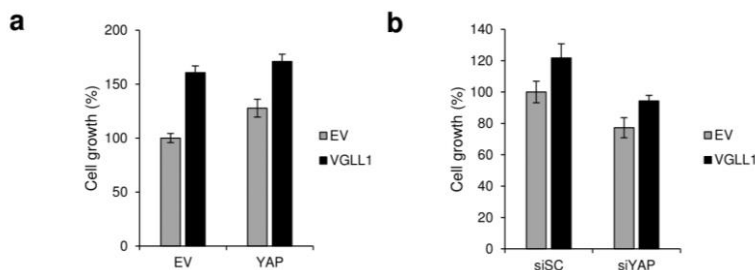

**Figure S4.** Effect of YAP knockdown/overexpression on cell growth in NUGC3-EV and NUGC3-VGLL1 cells. (a) NUGC3-EV and NUGC3-VGLL1 cells were transfected with pcDNA3.1 (EV) or pcDNA3.1-Myc-YAP. Cell growth was measured by live-cell imaging (IncuCyteZOOMsystem). (b) NUGC3-EV and NUGC3-VGLL1 cells were treated with 20 nM siScramble (SC) or siYAP. Cell growth was measured by live-cell imaging (IncuCyteZOOMsystem).
